# Supplementary material
Source: ML conference proceedings conference paper supplement (https://openreview.net/forum?id=PYqvzvr5F7)
Supplement: supplementary_material [file Appendix B.pdf › Appendix/Appendix B.pdf]

## Appendix B. Study results

Table 1. Descriptive Statistics for Main Study Variables (N = 300)

| Variable             | M    | SD   | Min  | Max  |
|----------------------|------|------|------|------|
| SMES                 | 1.93 | 0.77 | 0.00 | 3.67 |
| Empathy              | 2.75 | 1.06 | 0.29 | 4.86 |
| Group Cohesion       | 3.40 | 1.42 | 0.50 | 6.67 |
| Prosocial Intentions | 3.31 | 1.52 | 0.67 | 7.00 |
| Donation             | 0.44 | 0.23 | 0.00 | 1.00 |
| PHQ-9                | 1.53 | 0.79 | 0.00 | 3.22 |

Table 2. Correlations Among Study Variables

| Variable                | 1 | 2   | 3   | 4   | 5   | 6    |
|-------------------------|---|-----|-----|-----|-----|------|
| 1. SMES                 | — | .64 | .63 | .63 | .16 | -.25 |
| 2. Empathy              |   | —   | .83 | .87 | .22 | -.47 |
| 3. Group Cohesion       |   |     | —   | .81 | .20 | -.41 |
| 4. Prosocial Intentions |   |     |     | —   | .23 | -.48 |
| 5. Donation             |   |     |     |     | —   | -.18 |
| 6. PHQ-9                |   |     |     |     |     | —    |

Note. All correlations  $\geq |.18|$  are significant at  $p < .05$ .

Table 3. Regression Results for Mediation and Moderated Mediation Models

| Predictor                      | B   | SE  | t     | p     | 95% CI     |
|--------------------------------|-----|-----|-------|-------|------------|
| Elevation → Empathy            | .58 | .07 | 8.29  | <.001 | [.44, .72] |
| Empathy → Prosocial Intentions | .72 | .06 | 12.00 | <.001 | [.60, .84] |
| Group Cohesion                 | .21 | .05 | 4.20  | <.001 | [.11, .31] |
| Empathy × Group Cohesion       | .15 | .05 | 3.00  | .003  | [.05, .25] |
